# Supplementary material for: Visualization of MMP-2 Activity Using Dual-Probe Nanoparticles to Detect Potential Metastatic Cancer Cells
Source: Nanomaterials (Basel). 2018 Feb 21;8(2):119. doi: 10.3390/nano8020119 (PMC5853750; doi:10.3390/nano8020119)
Supplement: Supplementary file 1 [file nanomaterials-08-00119-s001.pdf]

## Supplementary Information

# Visualization of MMP-2 Activity Using Dual-Probe Nanoparticles to Detect Potential Metastatic Cancer Cells

Aeju Lee <sup>1,2,#</sup>, Sung Hoon Kim <sup>3,#</sup>, Hyun Lee <sup>4</sup>, Bohee Kim <sup>3</sup>, Yoon Suk Kim <sup>3</sup>, Jaehong Key <sup>4,\*</sup>

<sup>1</sup> International Research Organization for Advanced Science and Technology (IROAST), Kumamoto University, Japan; aeju-lee@kumamoto-u.ac.jp

<sup>2</sup> Magnesium Research Center, Kumamoto University, Japan; aeju-lee@kumamoto-u.ac.jp

<sup>3</sup> Department of Biomedical Laboratory Science, College of Health Sciences, Yonsei University, Wonju, Gangwon-do, 26493, Republic of Korea; yoonsukkim@yonsei.ac.kr

<sup>4</sup> Department of Biomedical Engineering, Yonsei University, Wonju, Gangwon-do, 26493, Republic of Korea; jkey@yonsei.ac.kr

\* Correspondence: jkey@yonsei.ac.kr; Tel.: +82-33-760-2857

# Contributed equally to this work.

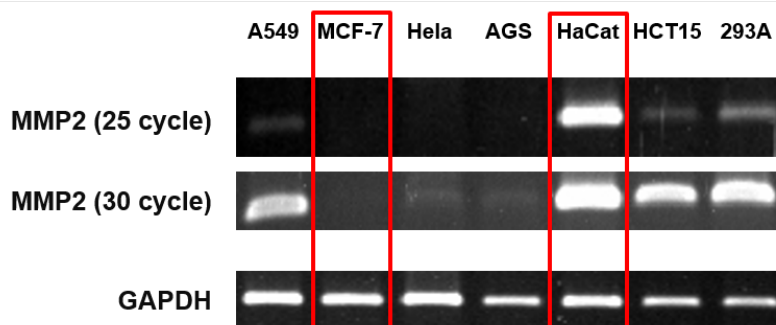

**Figure S1.** The MMP-2 mRNA level in MCF-7, HaCat, and other human cancer cell lines were analyzed by RT-PCR, using GAPDH as the internal control.

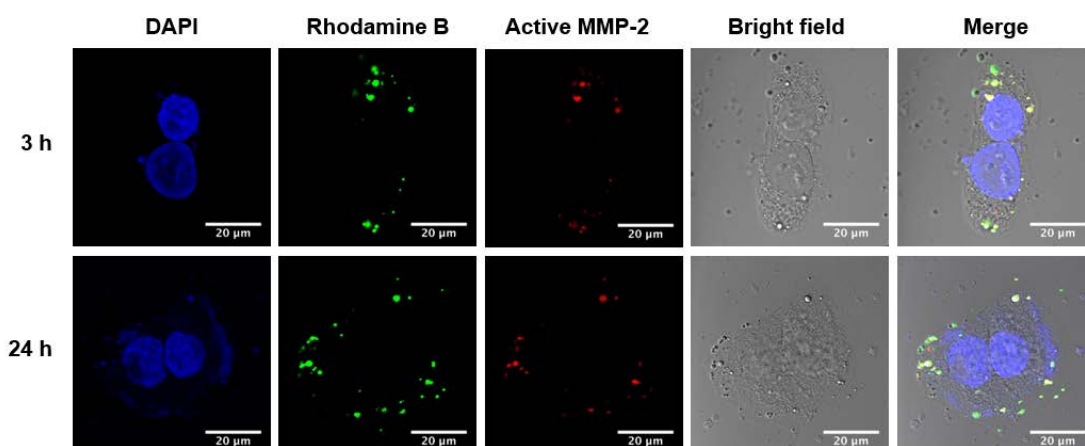

22 **Figure S2.** Cell culture showing the time-dependent activity of MMP-2 in HaCat cells. The cells  
23 were pre-cultured in serum-free media for 3 h and 24 h, and then incubated with MMP-2-  
24 PLGA-PEI nanoparticles, respectively, for 30 min. Scale bar: 20  $\mu\text{m}$ .
